# Supplementary material
Source: Frontiers journal article supplement (https://www.frontiersin.org/articles/387550)
Supplement: Data_Sheet_1.PDF [file Data_Sheet_1.PDF]

## Supplementary Material

# Psoralen Causes Liver Injury by Inducing Hepatocellular Cycle Arrest

Wang Zhou, Xi Chen, Guolin Zhao, Dengqiu Xu, Zhenzhou Jiang, Luyong Zhang\*, Tao Wang\*

\* **Correspondence:** Corresponding Author:

Email address: Luyong Zhang, lyzhang@cpu.edu.cn; Tao Wang, [wangtao1331@126.com](mailto:wangtao1331@126.com).  
Express delivery address: Jiangsu Key Laboratory of Drug Screening, China Pharmaceutical University, 24 Tong Jia Xiang, Gulou District, Nanjing 210009, China. Fax: + (86) 2583271500, Tel: + (86) 2583271023

## 1 Supplementary Tables

**Supplementary Table 1.** The primers used for real-time quantitative PCR in mice

| Gene           |                |                         |
|----------------|----------------|-------------------------|
| IL-6           | Forward primer | TACCACTTCACAAGTCGGAGGC  |
|                | Reverse primer | CTGCAAGTGCATCATCGTTGTTC |
| TNF- $\alpha$  | Forward primer | GGTGCCTATGTCTCAGCCTCTT  |
|                | Reverse primer | GCCATAGAAGTATGAGAGGGAG  |
| HGF            | Forward primer | GATGAGTGTGCCAACAGGTG    |
|                | Reverse primer | GTGATGGATACCGTCCCTTT    |
| TFAM           | Forward primer | ATGTCTCCGGATCGTTTCAC    |
|                | Reverse primer | CCAAAAAGACCTCGTTCAGC    |
| COX-1          | Forward primer | GAATGCCACCTTCATCCGAGAAG |
|                | Reverse primer | GCTCACATTGGAGAAGGACTCC  |
| $\beta$ -Actin | Forward primer | TATTGGCAACGAGCGGTTC     |
|                | Reverse primer | ATGCCACAGGATTCCATACCC   |

**Supplementary Table 2.** Sequence and results of LD<sub>50</sub> determination of psoralen in ICR mice

| Test sequence | Animal ID | Dose (mg/kg) | Short-term result(48h) | Long-term result(14days) |
|---------------|-----------|--------------|------------------------|--------------------------|
| 1             | 01        | 350          | Survival               | Survival                 |
| 2             | 02        | 700          | Survival               | Survival                 |
| 3             | 03        | 1390         | Survival               | Survival                 |
| 4             | 04        | 2000         | Survival               | Survival                 |
| 5             | 05        | 2000         | Death                  | Death                    |
| 6             | 06        | 1390         | Survival               | Survival                 |
| 7             | 07        | 2000         | Death                  | Death                    |
| 8             | 08        | 1390         | Death                  | Death                    |

ID= identification number; LD<sub>50</sub>= lethal dose 50

## 2 Supplementary Figures

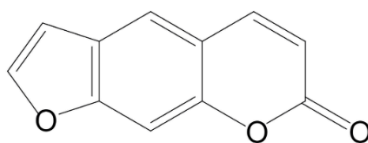

**Supplementary Figure 1.** The chemical structures of psoralen

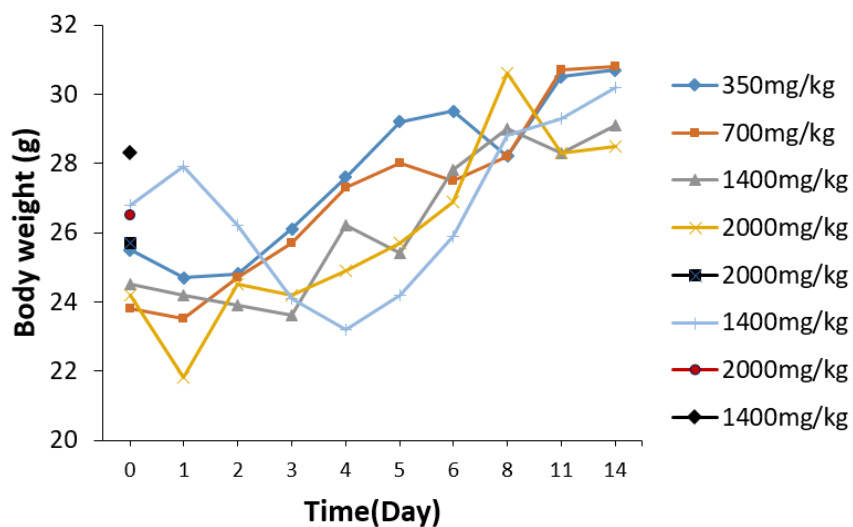

**Supplementary Figure 2.** Changes in body weight during the determination of acute oral LD50 in ICR mice. 8 ICR mice were treated with psoralen at the dose range of between 350mg/kg and 2000mg/kg within 14 days.

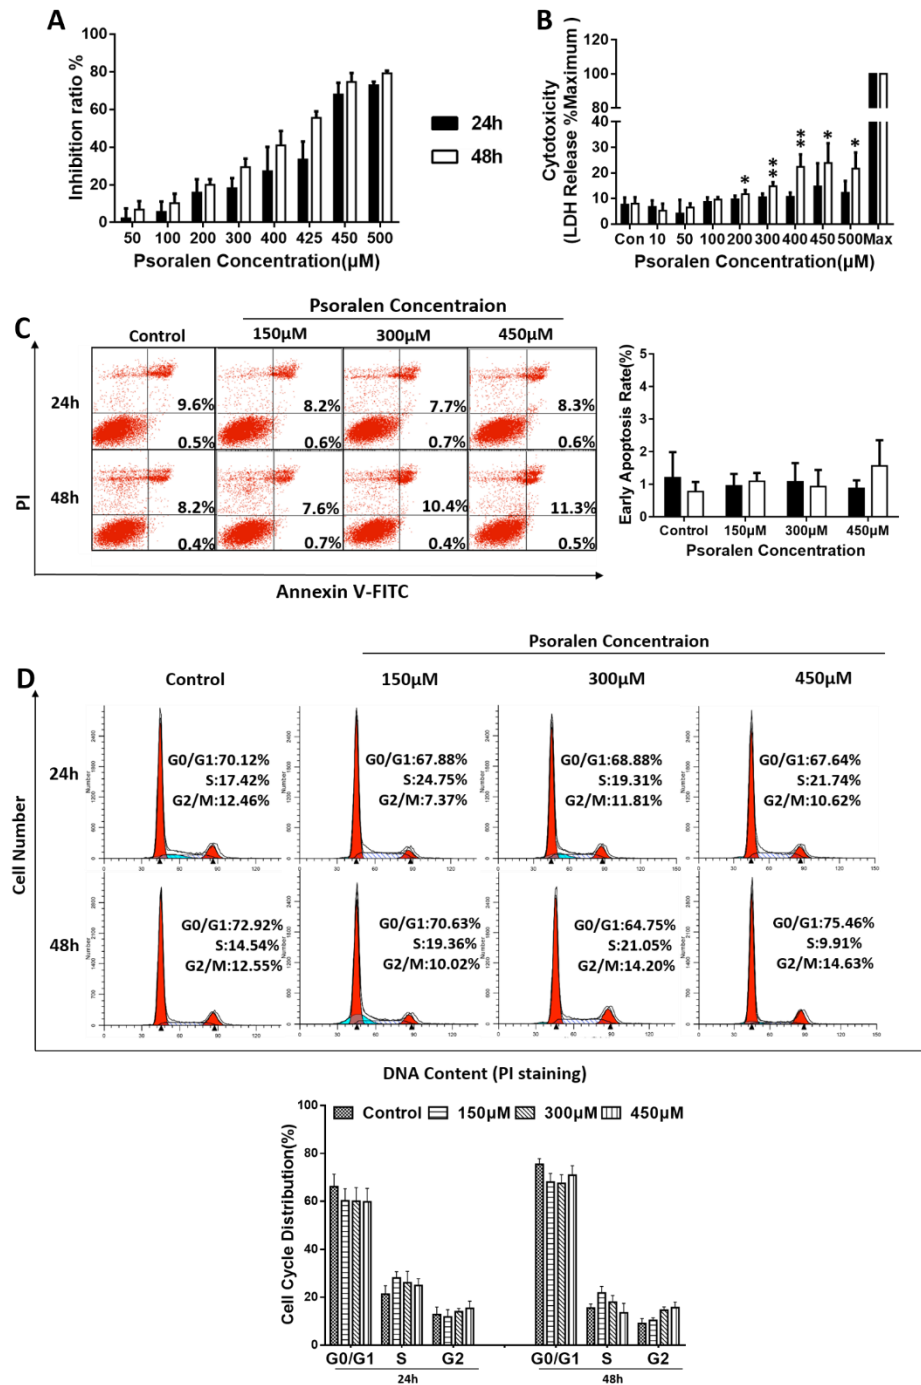

**Supplementary Figure 3. Psoralen inhibited the viability of HepG2 cells without apoptosis and cycle arrest.** HepG2 cells were treated with DMSO or psoralen. **(A)** MTT assay was used to determine HepG2 cells viability. **(B)** LDH release assay was used to evaluate the cell membrane integrity. **(C)** Apoptotic analysis was performed by annexin V-FITC/PI double staining. Left panel: representative results of flow cytometry analysis; Right panel: quantitative statistics of early apoptotic cells. **(D)** Cell cycle analysis by PI staining. Upper panel: representative results of flow cytometry analysis; Lower panel: quantitative statistics of cell cycle distribution. All experiments were performed three times independently and the quantitative data are shown as the means  $\pm$  SD. \* $p$ <0.05, \*\* $p$ <0.01, \*\*\* $p$ <0.001 versus control group.

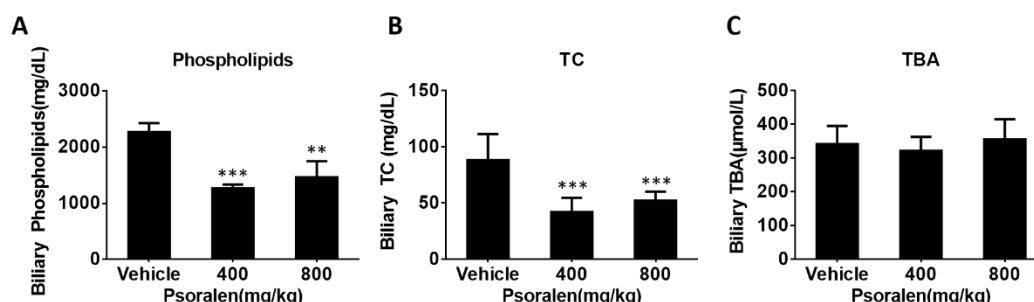

**Supplementary Figure 4. Changes in bile composition after psoralen administration.** C57BL/6 mice were treated with 0.5% CMC-Na solution (Vehicle group), or psoralen 400mg/kg and 800mg/kg for 24h. **(A)** Bile phospholipids were determined using Phospholipids C test (Wako Pure Chemicals, Osaka, Japan). **(B)** Bile Total Cholesterol (TC) was detected using a commercial kit according to the manufacturer's protocol (Whitman Biotech, Nanjing, China). **(C)** Bile TBA was determined using an HITACHI7080 Automatic Clinical Analyzer (HITACHI, Japan). Data are means  $\pm$ SD (n=8). \* $p$ <0.05, \*\* $p$ <0.01, \*\*\* $p$ <0.001 versus vehicle group.

### 3 Abbreviations

4E-BP1: eukaryotic translation initiation factor 4E (eIF4E) binding protein 1

ADP: adenosine diphosphate

AKT: protein kinase B

AMP: adenosine monophosphate

AMPK: adenosine monophosphate-activated protein kinase

ATP: adenosine triphosphate

CDK: cyclin-dependent kinase

CMC-Na: sodium carboxymethylcellulose

DAPI: 4',6-diamidino-2-phenylindole

DMSO: Dimethyl sulfoxide

HGF: hepatocyte growth factor

HPLC: High-performance liquid chromatography

IL-6: interleukin-6

MDR3: multidrug resistance 3 P glycoprotein

mTORC1: mammalian target of rapamycin complex 1

NF- $\kappa$ B: nuclear factor-kappa B

p70S6K: 70 kDa ribosomal protein S6 kinase

PCNA: proliferating cell nuclear antigen

STAT3: signal transducer and activator of transcription 3

TNF- $\alpha$ : tumor necrosis factor alpha
